# Supplementary material for: Assessment of body mass index and body composition with physical activity and dietary preferences in university students
Source: Research Square preprint supplement (doi:10.21203/rs.3.rs-2142520/v1), 2022-10-13
Supplement: Supplementary file 1 [file af08c8caccc85982a32c08b0.xlsx]

## Sheet: Table 1
	Men								Women
Body composition	Mean±SD	Median (min; max)	NR		UL		LL		Mean±SD	Median (min; max)	NR		UL		LL
			N	%	N	%	N	%			N	%	N	%	N	%
Age (years)	21.5±1.02	21 (20;24)							21,6±1.46	21 (19;25)
Weight (kg)	77.7±10.22	78.5 (53.5;102.2)	17	89.5	2	10.5	0	0	62,6±8.74	62.2 (44.9;91.1)	90	79.7	18	15.9	5	4.4
Body Fat Mass (kg) BFM*	11.7±4.80	9.9 (5.6;24.9)	12	63.2	2	10.5	5	26.3	17.3±6.42	16.2 (7.1;47.7)	58	51.3	33	29.2	22	19.5
Skeletal Muscle Mass (kg) SMM*	37.7±5.01	37.6 (26.4;47.9)	12	63.2	7	36.8	0	0	24.9±3.15	29.9 (17.2;34.7)	80	70.8	5	4.4	28	24.8
Fat Freee Mass (kg) FFM*	66.0±8.22	66.2 (47.4;83.6)	13	68.4	6	31.6	0	0	45.3±5.26	45.4 (32.3;61)	83	73.5	5	4.4	25	22.1
Percent Body Fat (%) PBF*	14.8±5.01	13.7 (6.8;27.7)	14	73.7	3	15.8	2	10.5	27.1±6.84	26.4 (11.8;52.3)	55	48.7	50	44.3	8	7.1
Body Mass Index (kg/m2) BMI⁑	23.7±2.37	23.3 (20.1;29.7)	17	89.5	2	10.5	0	0	22.3±2.88	21.9 (16.3;33.5)	88	77.9	17	15.0	8	7.1
Waist-Hip Ratio (WHR)⁑	0.84±0.05	0.83 (0.75;0.98)	14	73.7	2	10.5	3	15.8	0.87±0.05	0.86 (0.77;1.03)	56	49.6	57	50.4	0	0
Protein (kg)*	13.2±1.67	13.2 (9.4;16.6)	12	63.2	7	36.8	0	0	8.9±1.04	8.9 (6.3;12.2)	85	75.2	5	4.4	23	20.4
Minerals (kg)*	4.5±0.60	4.6 (3.3;5.9)	12	63.2	7	36.8	0	0	3.2±0.39	3.2 (2.3;4.5)	88	77.9	18	15.9	7	6.2
Total Body Water (L) TBW*	48.3±5.99	48.4 (34.7;61.1)	13	68.4	6	31.6	0	0	33.2±3.84	32.2 (23.7;44.8)	85	75.2	4	3.6	24	21.2
Soft Lean Mass (kg) SLM*	62.3±7.74	62.4 (44.7;78.7)	13	68.4	6	31.6	0	0	42.7±4.94	42.7 (30.5;57.7)	84	74.3	4	3.5	25	22.1
Bone Mineral Content (kg) BMC*	3.7±0.49	3.8 (2.7;4.87)	12	63.2	7	36.8	0	0	2.7±0.33	2.7 (1.8;3.73)	86	76.1	19	16.8	8	7.1
N - number; NR - normal range; UL - above the upper limit; LL - below the lower limit
*p < 0.001, Welch´s test; ⁑ p=0.025, Welch´s test
