# Supplementary material for: Assessment of body mass index and body composition with physical activity and dietary preferences in university students
Source: Research Square preprint supplement (doi:10.21203/rs.3.rs-2142520/v1), 2022-10-13
Supplement: Supplementary file 2 [file dec191e5756dbeae28af0376.xlsx]

## Sheet: Table3
	Men				Women
			Total=19				Total=113
	Items affecting food choice	Category	N	%	Items affecting food choice	Category	N	%
Very important	tastes good	Sensory Appeal	10	0.526316	can be cooked very simply	Convenience	78	0.690265
	is nutritious	Health	9	0.473684	is packaged in an environmentally friendly way	Ethical Concern	49	0.433628
	easy to cook	Convenience	8	0.421053	is good value for money	Price	47	0.415929
	is good value for money	Price	8	0.421053	looks nice	Sensory Appeal	46	0.40708
	keeps me healthy	Health	8	0.421053	helps me cope with stress	Mood	45	0.39823
	makes me feel good	Mood	8	0.421053	keeps me awake and alert	Mood	45	0.39823
	smells nice	Sensory Appeal	7	0.368421	is familiar to me	Familiarity	44	0.389381
	is high in protein	Health	6	0.315789	is like the food I ate when I was a child	Familiarity	43	0.380531
Not important at all	comes from countries I approve of politically	EthicalConcern	13	0.684211	tastes good	Sensory Appeal	66	0.584071
	has the country of origin clearly marked	EthicalConcern	9	0.473684	smells nice	Sensory Appeal	51	0.451327
	is low in calories	Weight Control	7	0.368421	is cheap	Price	43	0.380531
N=number
